# Supplementary material for: Developing best practices for genotyping-by-sequencing analysis in the construction of linkage maps
Source: PubMed Central journal article supplement (PMC10603770; doi:10.1093/gigascience/giad092), 2023-10-27
Supplement: giad092_response_to_reviewer_comments_revision_1.pdf [file giad092_response_to_reviewer_comments_revision_1.pdf]

## **Author's Response To Reviewer Comments**

Dear editor and reviewers,

We changed the title as suggested by reviewer #2 and made the other required modifications.

Thank you for your great work on this.
