# Supplementary material for: Developing best practices for genotyping-by-sequencing analysis in the construction of linkage maps
Source: PubMed Central journal article supplement (PMC10603770; doi:10.1093/gigascience/giad092), 2023-10-27
Supplement: giad092_response_to_reviewer_comments_revision_2.pdf [file giad092_response_to_reviewer_comments_revision_2.pdf]

## Author's Response To Reviewer Comments

Hello,

We included a new symbol to denote the shared senior authorship and kept only two corresponding authors.

Best regards
